# Supplementary material for: Confinement of MOF etching-induced hollow heterostructured cages in the carbon framework for efficient peroxymonosulfate activation
Source: Royal Society of Chemistry journal article supplement (doi:10.1039/d3nj05687b), 2024-01-01
Supplement: d3nj05687b1.pdf [file d3nj05687b1.pdf]

**Confinement of MOF etching-induced hollow  
heterostructured cages in carbon framework for  
perxymonosulfate activation**

*Jie Ding<sup>\*a</sup>, Xue-qin Liu<sup>a</sup>, Lei Wang<sup>b</sup>, Ying-bo Zhu<sup>b</sup>*

College of Chemistry and Chemical Engineering, Ningxia Vocational technical

College of Industry and Commerce, Yinchuan 750021, China.

State Key Laboratory of High-efficiency Coal Utilization and Green Chemical  
Engineering. College of Chemistry and Chemical Engineering, Ningxia University,  
Yinchuan 750021, China.

\*Corresponding author:

Jie Ding

College of Chemistry and Chemical Engineering, Ningxia Vocational technical

College of Industry and Commerce, Yinchuan 750021, China

E-mail: enjoydingfei@163.com (Jie Ding)

## Supporting tables and figures

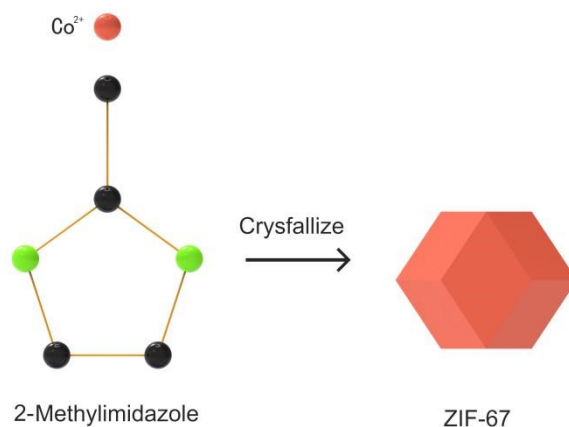

**Figure S1** Schematic illustration of the synthetic process of a ZIF-67

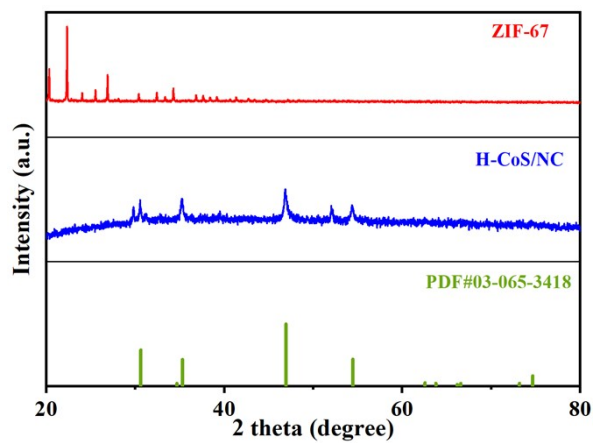

**Figure S2** XRD pattern of ZIF-67 and H-CoS/NC.

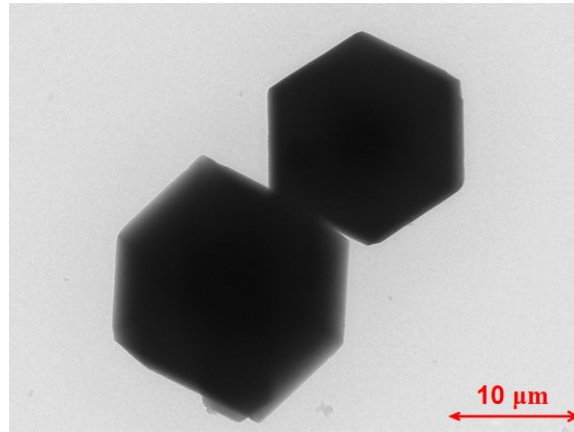

**Figure S3** TEM image pattern of ZIF-67.

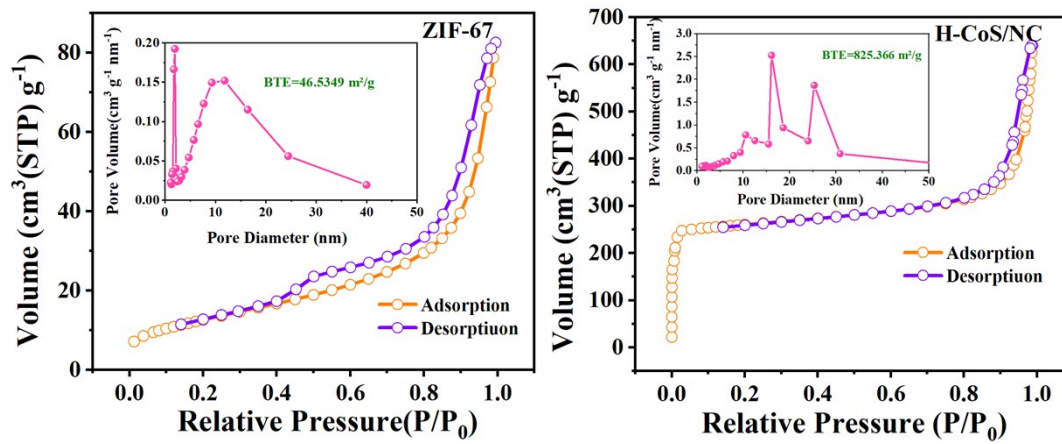

**Figure S4** N<sub>2</sub> adsorption-desorption isotherms of ZIF-67 and H-CoS/NC.

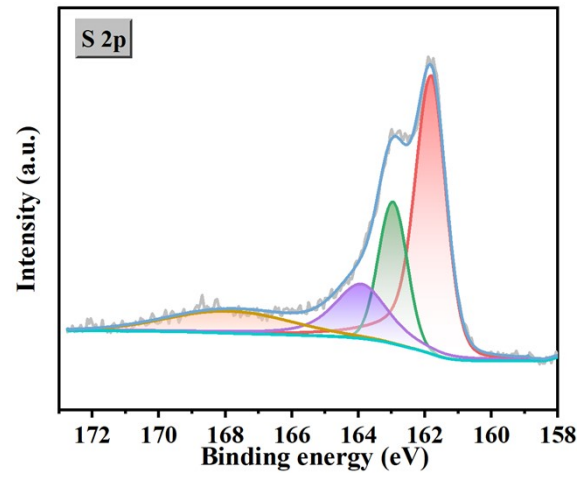

**Figure S5** XPS spectra of S 2p.
